# Supplementary material for: Carbon Dioxide Emissions Mitigation Strategy through Enhanced Geothermal Systems: Western Anatolia, Turkey
Source: Research Square preprint supplement (doi:10.21203/rs.3.rs-876036/v1), 2021-10-25
Supplement: Supplementary file 1 [file f59771252cdc846e8549f23a.docx]

**Conflicts of interests**

The authors declare that they have no conflicts of interest.
